# Supplementary material for: k-mer Similarity, Networks of Microbial Genomes, and Taxonomic Rank
Source: PubMed Central journal article supplement (PMC6247013; doi:10.1128/msystems.00257-18), 2018-11-20
Supplement: sys006182296sf1.pdf [file sys006182296sf1.pdf]

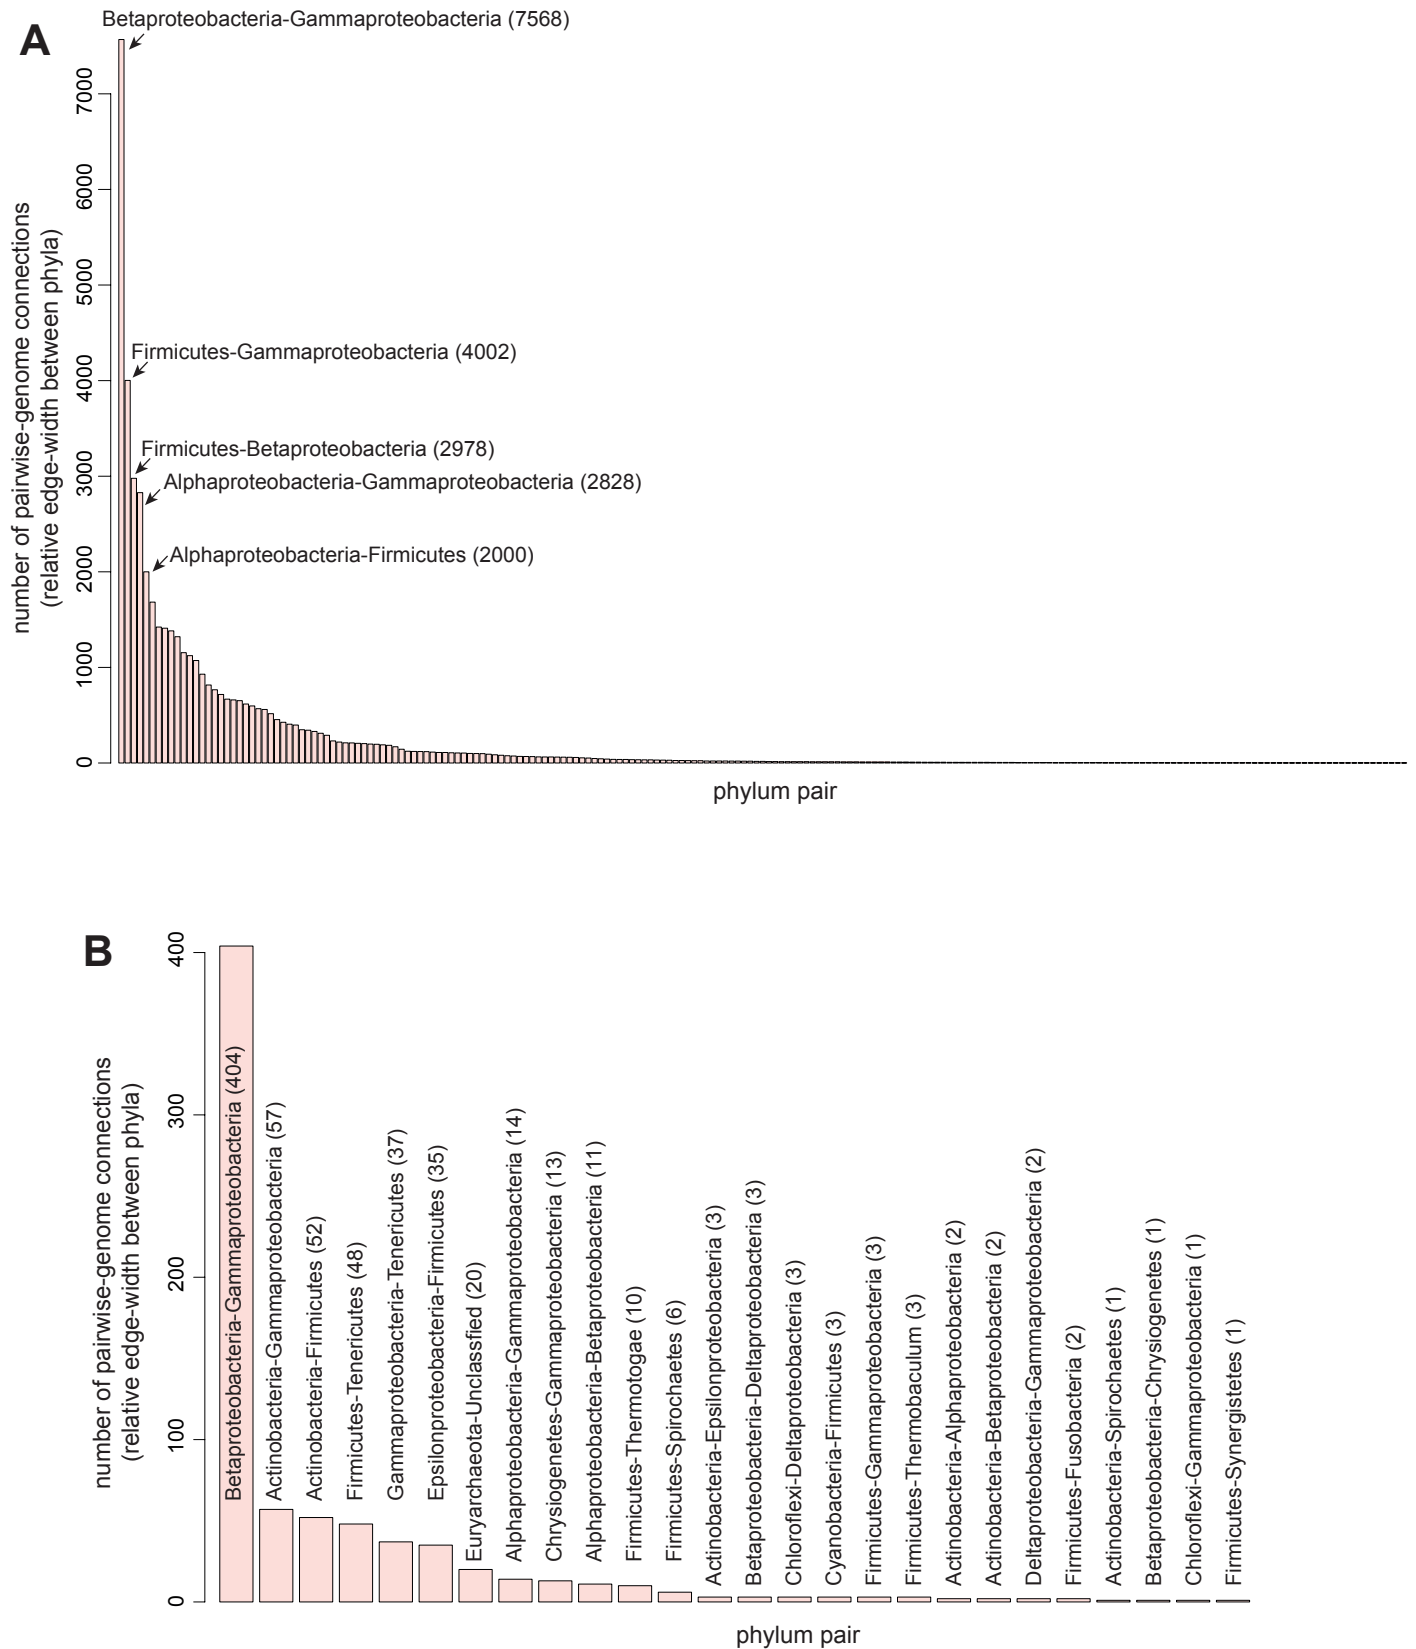

**Figure S1.** Number of pair-wise genome connections (relative edge width) between each pair of phyla, for the networks shown in (A) Figure 2 (only five most abundant pairs are labelled), and (B) Figure 3.
