# Supplementary material for: k-mer Similarity, Networks of Microbial Genomes, and Taxonomic Rank
Source: PubMed Central journal article supplement (PMC6247013; doi:10.1128/msystems.00257-18), 2018-11-20
Supplement: sys006182296sf2.pdf [file sys006182296sf2.pdf]

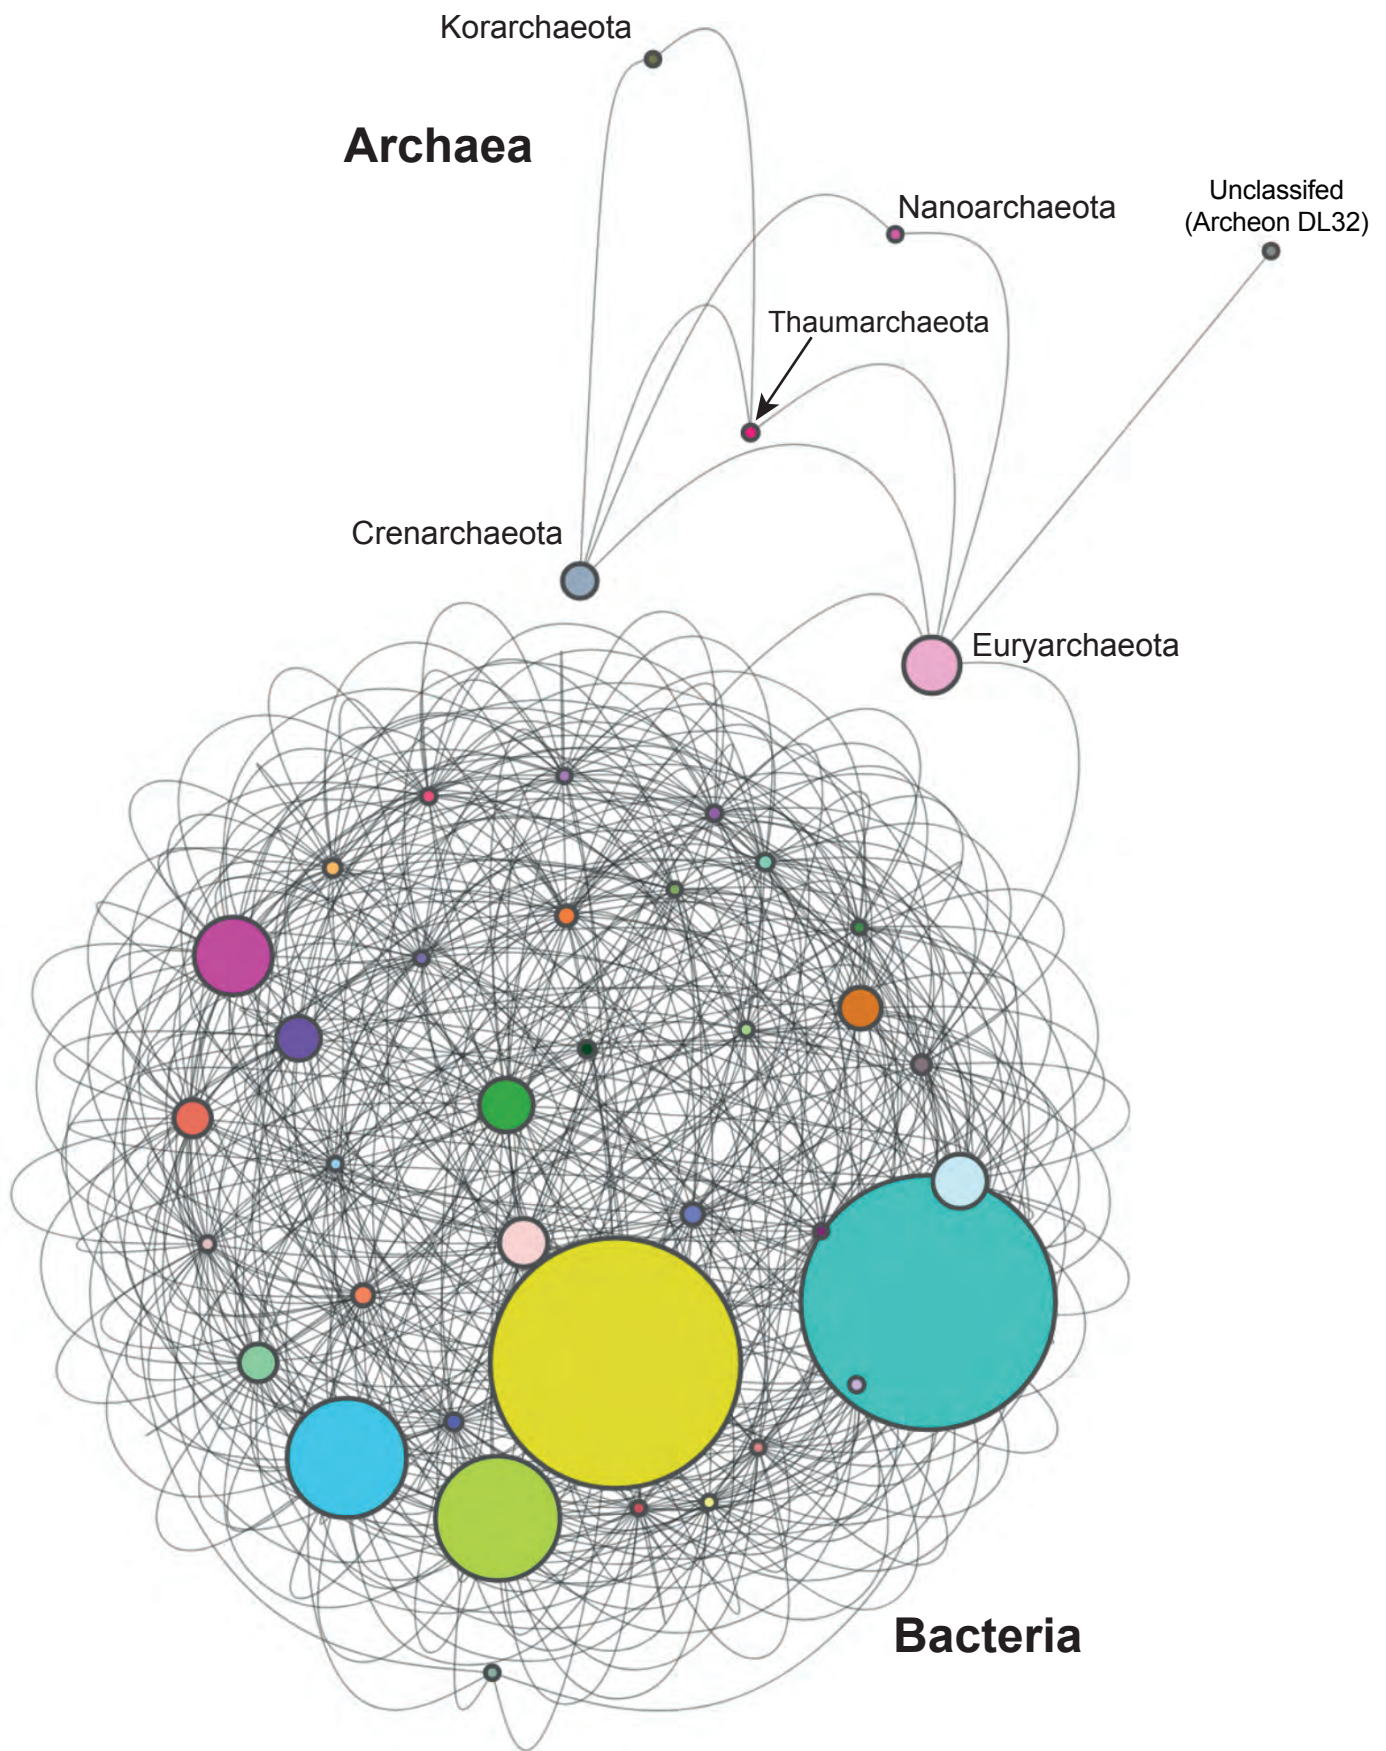

**Figure S2.** *P*-network of 2616 prokaryote genomes using  $D_2^S$  with  $k = 25$  based on rRNA genes only, at  $t = 6$ . An edge between two nodes represents one or more connections between isolates from the two phyla. Archaeal phyla (labelled) are clearly separated from bacterial phyla.
