# Supplementary material for: k-mer Similarity, Networks of Microbial Genomes, and Taxonomic Rank
Source: PubMed Central journal article supplement (PMC6247013; doi:10.1128/msystems.00257-18), 2018-11-20
Supplement: sys006182296sf3.pdf [file sys006182296sf3.pdf]

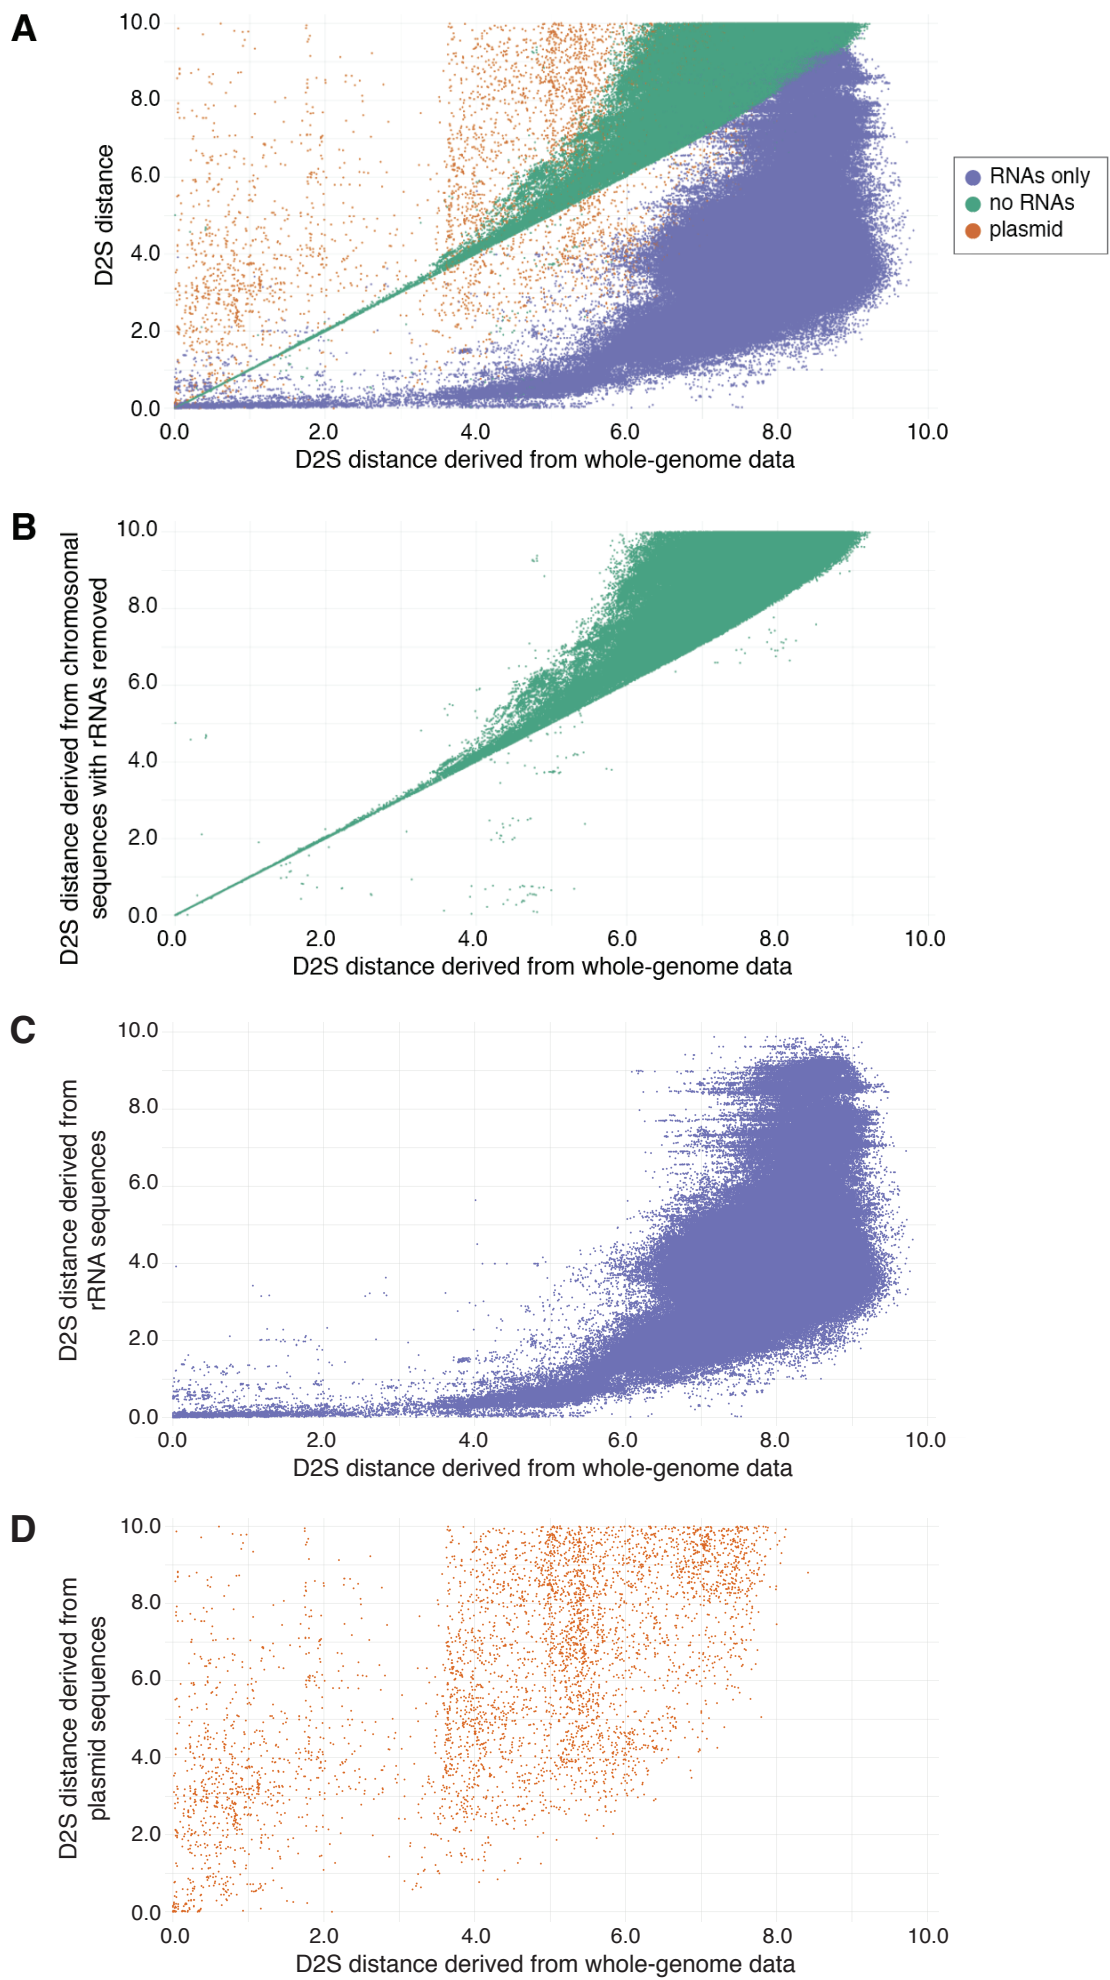

**Figure S3.** Relationship of pairwise  $D_2^S$  distances derived from whole-genome datasets with those derived from distinct genome components. The composite plot is shown in (A), with the individual plot is shown for (B) chromosomal sequences with rRNAs removed, (C) rRNAs sequences, and (D) plasmid sequences.
