# Supplementary material for: k-mer Similarity, Networks of Microbial Genomes, and Taxonomic Rank
Source: PubMed Central journal article supplement (PMC6247013; doi:10.1128/msystems.00257-18), 2018-11-20
Supplement: sys006182296sf4.pdf [file sys006182296sf4.pdf]

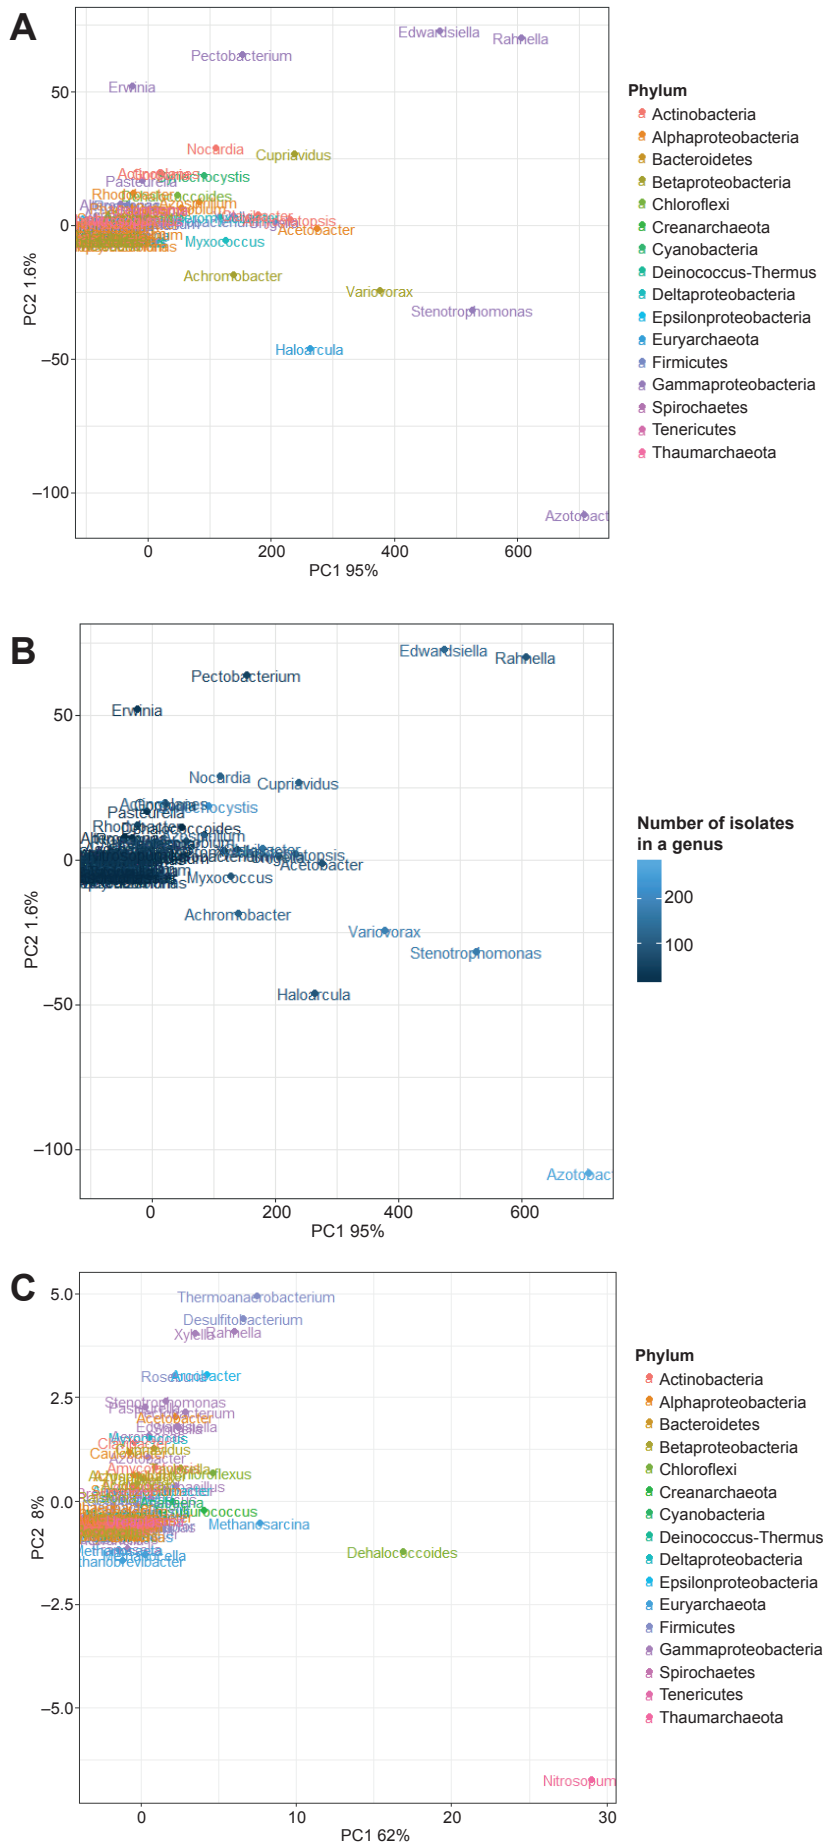

**Figure S4.** Principal component analysis (PCA) of core  $k$ -mers and their annotated COG categories, based on core  $k$ -mers in each (A) phylum and (B) genus. The PCA of core  $k$ -mers in each phylum performed on the normalised counts of COG categories in centred scale is shown in (C).
