# Supplementary material for: k-mer Similarity, Networks of Microbial Genomes, and Taxonomic Rank
Source: PubMed Central journal article supplement (PMC6247013; doi:10.1128/msystems.00257-18), 2018-11-20
Supplement: sys006182296st1.pdf [file sys006182296st1.pdf]

**Table S1.** Characteristics of the phylogenomic network of 2616 prokaryote genomes based on rRNA genes only.

| Threshold | Number of non-singleton nodes, $c$ | Density, $D$ | Size of the maximal clique, $z$ | Number of cliques, $n$ |
|-----------|------------------------------------|--------------|---------------------------------|------------------------|
| 0         | 2616                               | 0.901        | 2356                            | N/A                    |
| 1         | 2616                               | 0.897        | 2356                            | N/A                    |
| 2         | 2616                               | 0.887        | 2344                            | N/A                    |
| 3         | 2616                               | 0.867        | 2332                            | N/A                    |
| 4         | 2616                               | 0.856        | 2291                            | N/A                    |
| 5         | 2616                               | 0.821        | 2045                            | N/A                    |
| 6         | 2613                               | 0.635        | 1321                            | N/A                    |
| 7         | 2597                               | 0.156        | 530                             | N/A                    |
| 8         | 2509                               | 0.054        | 299                             | 45272                  |
| 9         | 2162                               | 0.012        | 185                             | 289                    |
