# Supplementary material for: k-mer Similarity, Networks of Microbial Genomes, and Taxonomic Rank
Source: PubMed Central journal article supplement (PMC6247013; doi:10.1128/msystems.00257-18), 2018-11-20
Supplement: sys006182296st2.pdf [file sys006182296st2.pdf]

**Table S2.** Core *k*-mers identified in 151 genera of prokaryotes.

| <b>Genus</b>                 | <b>Number of distinct core <i>k</i>-mers</b> | <b>Number of isolates</b> | <b>Number of core <i>k</i>-mers per isolate, <i>K</i></b> |
|------------------------------|----------------------------------------------|---------------------------|-----------------------------------------------------------|
| <i>Azotobacter</i>           | 5166237                                      | 3                         | 1722079.00                                                |
| <i>Synechocystis</i>         | 3526700                                      | 6                         | 587783.33                                                 |
| <i>Rahnella</i>              | 1053800                                      | 3                         | 351266.67                                                 |
| <i>Acetobacter</i>           | 2042974                                      | 9                         | 226997.11                                                 |
| <i>Haloarcula</i>            | 564756                                       | 3                         | 188252.00                                                 |
| <i>Edwardsiella</i>          | 643366                                       | 4                         | 160841.50                                                 |
| <i>Hydrogenobaculum</i>      | 482260                                       | 3                         | 160753.33                                                 |
| <i>Xylella</i>               | 627213                                       | 5                         | 125442.60                                                 |
| <i>Stenotrophomonas</i>      | 384359                                       | 4                         | 96089.75                                                  |
| <i>Clavibacter</i>           | 245101                                       | 3                         | 81700.33                                                  |
| <i>Variovorax</i>            | 232615                                       | 3                         | 77538.33                                                  |
| <i>Pasteurella</i>           | 201523                                       | 4                         | 50380.75                                                  |
| <i>Ureaplasma</i>            | 141564                                       | 3                         | 47188.00                                                  |
| <i>Shigella</i>              | 336980                                       | 10                        | 33698.00                                                  |
| <i>Achromobacter</i>         | 87624                                        | 3                         | 29208.00                                                  |
| <i>Phaeobacter</i>           | 79509                                        | 3                         | 26503.00                                                  |
| <i>Myxococcus</i>            | 72867                                        | 3                         | 24289.00                                                  |
| <i>Amycolatopsis</i>         | 113989                                       | 5                         | 22797.80                                                  |
| <i>Cupriavidus</i>           | 65493                                        | 3                         | 21831.00                                                  |
| <i>Coxiella</i>              | 104030                                       | 5                         | 20806.00                                                  |
| <i>Pectobacterium</i>        | 76126                                        | 5                         | 15225.20                                                  |
| <i>Thermoanaerobacterium</i> | 39395                                        | 3                         | 13131.67                                                  |
| <i>Nocardia</i>              | 36570                                        | 3                         | 12190.00                                                  |
| <i>Azospirillum</i>          | 28797                                        | 3                         | 9599.00                                                   |
| <i>Anaeromyxobacter</i>      | 31770                                        | 4                         | 7942.50                                                   |
| <i>Meiothermus</i>           | 21977                                        | 3                         | 7325.67                                                   |
| <i>Aeromonas</i>             | 24147                                        | 4                         | 6036.75                                                   |
| <i>Gordonia</i>              | 17512                                        | 3                         | 5837.33                                                   |
| <i>Actinoplanes</i>          | 20813                                        | 4                         | 5203.25                                                   |
| <i>Roseburia</i>             | 14944                                        | 3                         | 4981.33                                                   |
| <i>Aggregatibacter</i>       | 18551                                        | 4                         | 4637.75                                                   |
| <i>Caulobacter</i>           | 16487                                        | 4                         | 4121.75                                                   |
| <i>Dehalococcoides</i>       | 31804                                        | 8                         | 3975.50                                                   |
| <i>Desulfitobacterium</i>    | 15811                                        | 4                         | 3952.75                                                   |
| <i>Chloroflexus</i>          | 9267                                         | 3                         | 3089.00                                                   |
| <i>Pediococcus</i>           | 8560                                         | 3                         | 2853.33                                                   |
| <i>Gluconacetobacter</i>     | 8177                                         | 3                         | 2725.67                                                   |
| <i>Desulfosporosinus</i>     | 7832                                         | 3                         | 2610.67                                                   |
| <i>Nitrosopumilus</i>        | 7442                                         | 3                         | 2480.67                                                   |
| <i>Carnobacterium</i>        | 7435                                         | 3                         | 2478.33                                                   |
| <i>Erwinia</i>               | 15869                                        | 7                         | 2267.00                                                   |
| <i>Oligotropha</i>           | 6700                                         | 3                         | 2233.33                                                   |
| <i>Cronobacter</i>           | 10482                                        | 5                         | 2096.40                                                   |
| <i>Sinorhizobium</i>         | 20194                                        | 10                        | 2019.40                                                   |
| <i>Riemerella</i>            | 9742                                         | 5                         | 1948.40                                                   |
| <i>Acidovorax</i>            | 9544                                         | 5                         | 1908.80                                                   |
| <i>Mesorhizobium</i>         | 7575                                         | 4                         | 1893.75                                                   |
| <i>Methanosarcina</i>        | 7548                                         | 4                         | 1887.00                                                   |
| <i>Marinomonas</i>           | 5524                                         | 3                         | 1841.33                                                   |
| <i>Dickeya</i>               | 7131                                         | 4                         | 1782.75                                                   |
| <i>Psychrobacter</i>         | 7024                                         | 4                         | 1756.00                                                   |
| <i>Anabaena</i>              | 4613                                         | 3                         | 1537.67                                                   |
| <i>Taylorella</i>            | 7201                                         | 5                         | 1440.20                                                   |
| <i>Agrobacterium</i>         | 5343                                         | 4                         | 1335.75                                                   |

| <b>Genus</b>                | <b>Number of distinct core <i>k</i>-mers</b> | <b>Number of isolates</b> | <b>Number of core <i>k</i>-mers per isolate, <i>K</i></b> |
|-----------------------------|----------------------------------------------|---------------------------|-----------------------------------------------------------|
| <i>Exiguobacterium</i>      | 5335                                         | 4                         | 1333.75                                                   |
| <i>Arcobacter</i>           | 6665                                         | 5                         | 1333.00                                                   |
| <i>Marinobacter</i>         | 4554                                         | 4                         | 1138.50                                                   |
| <i>Nitrosococcus</i>        | 3395                                         | 3                         | 1131.67                                                   |
| <i>Rhodococcus</i>          | 6153                                         | 6                         | 1025.50                                                   |
| <i>Actinobacillus</i>       | 4920                                         | 5                         | 984.00                                                    |
| <i>Pantoea</i>              | 5889                                         | 6                         | 981.50                                                    |
| <i>Pseudoalteromonas</i>    | 2877                                         | 3                         | 959.00                                                    |
| <i>Liberibacter</i>         | 3637                                         | 4                         | 909.25                                                    |
| <i>Nostoc</i>               | 3218                                         | 4                         | 804.50                                                    |
| <i>Sulcia</i>               | 3978                                         | 5                         | 795.60                                                    |
| <i>Acidithiobacillus</i>    | 3158                                         | 4                         | 789.50                                                    |
| <i>Bdellovibrio</i>         | 2278                                         | 3                         | 759.33                                                    |
| <i>Glaciecola</i>           | 2150                                         | 3                         | 716.67                                                    |
| <i>Sphingobium</i>          | 2129                                         | 3                         | 709.67                                                    |
| <i>Methanocaldococcus</i>   | 3459                                         | 5                         | 691.80                                                    |
| <i>Klebsiella</i>           | 7918                                         | 12                        | 659.83                                                    |
| <i>Rhodobacter</i>          | 3139                                         | 5                         | 627.80                                                    |
| <i>Mannheimia</i>           | 4585                                         | 8                         | 573.13                                                    |
| <i>Rhizobium</i>            | 5011                                         | 9                         | 556.78                                                    |
| <i>Acholeplasma</i>         | 1526                                         | 3                         | 508.67                                                    |
| <i>Desulfurococcus</i>      | 1497                                         | 3                         | 499.00                                                    |
| <i>Geobacillus</i>          | 5271                                         | 11                        | 479.18                                                    |
| <i>Arthrobacter</i>         | 2775                                         | 6                         | 462.50                                                    |
| <i>Portiera</i>             | 2291                                         | 5                         | 458.20                                                    |
| <i>Hyphomicrobium</i>       | 1779                                         | 4                         | 444.75                                                    |
| <i>Alteromonas</i>          | 5742                                         | 14                        | 410.14                                                    |
| <i>Blochmannia</i>          | 1625                                         | 4                         | 406.25                                                    |
| <i>Methanobacterium</i>     | 1194                                         | 3                         | 398.00                                                    |
| <i>Yersinia</i>             | 7235                                         | 19                        | 380.79                                                    |
| <i>Rhodopseudomonas</i>     | 2661                                         | 7                         | 380.14                                                    |
| <i>Porphyromonas</i>        | 1516                                         | 4                         | 379.00                                                    |
| <i>Methanocella</i>         | 1105                                         | 3                         | 368.33                                                    |
| <i>Nitrosomonas</i>         | 1435                                         | 4                         | 358.75                                                    |
| <i>Methanobrevibacter</i>   | 1067                                         | 3                         | 355.67                                                    |
| <i>Rhodospirillum</i>       | 1410                                         | 4                         | 352.50                                                    |
| <i>Leuconostoc</i>          | 2725                                         | 8                         | 340.63                                                    |
| <i>Legionella</i>           | 4291                                         | 13                        | 330.08                                                    |
| <i>Lactococcus</i>          | 4243                                         | 13                        | 326.38                                                    |
| <i>Brucella</i>             | 6507                                         | 20                        | 325.35                                                    |
| <i>Acinetobacter</i>        | 5990                                         | 19                        | 315.26                                                    |
| <i>Methylobacterium</i>     | 2433                                         | 8                         | 304.13                                                    |
| <i>Caldicellulosiruptor</i> | 2366                                         | 8                         | 295.75                                                    |
| <i>Thermoanaerobacter</i>   | 2274                                         | 8                         | 284.25                                                    |
| <i>Enterobacter</i>         | 2957                                         | 11                        | 268.82                                                    |
| <i>Listeria</i>             | 9012                                         | 34                        | 265.06                                                    |
| <i>Flavobacterium</i>       | 1303                                         | 5                         | 260.60                                                    |
| <i>Paenibacillus</i>        | 2784                                         | 11                        | 253.09                                                    |
| <i>Bartonella</i>           | 2154                                         | 9                         | 239.33                                                    |
| <i>Neisseria</i>            | 4303                                         | 18                        | 239.06                                                    |
| <i>Methanosaeta</i>         | 711                                          | 3                         | 237.00                                                    |
| <i>Enterococcus</i>         | 2532                                         | 13                        | 194.77                                                    |
| <i>Thioalkalivibrio</i>     | 558                                          | 3                         | 186.00                                                    |
| <i>Desulfotomaculum</i>     | 1022                                         | 6                         | 170.33                                                    |
| <i>Bradyrhizobium</i>       | 825                                          | 5                         | 165.00                                                    |
| <i>Cyanothece</i>           | 833                                          | 6                         | 138.83                                                    |
| <i>Prochlorococcus</i>      | 1564                                         | 12                        | 130.33                                                    |

| <b>Genus</b>             | <b>Number of distinct core <i>k</i>-mers</b> | <b>Number of isolates</b> | <b>Number of core <i>k</i>-mers per isolate, <i>K</i></b> |
|--------------------------|----------------------------------------------|---------------------------|-----------------------------------------------------------|
| <i>Vibrio</i>            | 3081                                         | 24                        | 128.38                                                    |
| <i>Geobacter</i>         | 1138                                         | 9                         | 126.44                                                    |
| <i>Gardnerella</i>       | 368                                          | 3                         | 122.67                                                    |
| <i>Tremblaya</i>         | 356                                          | 3                         | 118.67                                                    |
| <i>Shewanella</i>        | 2846                                         | 24                        | 118.58                                                    |
| <i>Serratia</i>          | 1275                                         | 11                        | 115.91                                                    |
| <i>Deinococcus</i>       | 792                                          | 7                         | 113.14                                                    |
| <i>Prevotella</i>        | 674                                          | 6                         | 112.33                                                    |
| <i>Escherichia</i>       | 5893                                         | 64                        | 92.08                                                     |
| <i>Carsonella</i>        | 572                                          | 7                         | 81.71                                                     |
| <i>Buchnera</i>          | 993                                          | 13                        | 76.38                                                     |
| <i>Propionibacterium</i> | 718                                          | 14                        | 51.29                                                     |
| <i>Salmonella</i>        | 2254                                         | 46                        | 49.00                                                     |
| <i>Frankia</i>           | 178                                          | 5                         | 35.60                                                     |
| <i>Brachyspira</i>       | 242                                          | 7                         | 34.57                                                     |
| <i>Thermus</i>           | 236                                          | 7                         | 33.71                                                     |
| <i>Staphylococcus</i>    | 2002                                         | 60                        | 33.37                                                     |
| <i>Ehrlichia</i>         | 187                                          | 6                         | 31.17                                                     |
| <i>Pyrococcus</i>        | 201                                          | 7                         | 28.71                                                     |
| <i>Spiroplasma</i>       | 129                                          | 5                         | 25.80                                                     |
| <i>Francisella</i>       | 383                                          | 19                        | 20.16                                                     |
| <i>Desulfovibrio</i>     | 265                                          | 14                        | 18.93                                                     |
| <i>Treponema</i>         | 208                                          | 17                        | 12.24                                                     |
| <i>Corynebacterium</i>   | 605                                          | 51                        | 11.86                                                     |
| <i>Pyrobaculum</i>       | 75                                           | 7                         | 10.71                                                     |
| <i>Lactobacillus</i>     | 515                                          | 57                        | 9.04                                                      |
| <i>Leptospira</i>        | 60                                           | 7                         | 8.57                                                      |
| <i>Archaeoglobus</i>     | 32                                           | 4                         | 8.00                                                      |
| <i>Wolbachia</i>         | 45                                           | 7                         | 6.43                                                      |
| <i>Ruminococcus</i>      | 23                                           | 4                         | 5.75                                                      |
| <i>Anaplasma</i>         | 45                                           | 9                         | 5.00                                                      |
| <i>Ralstonia</i>         | 53                                           | 11                        | 4.82                                                      |
| <i>Chlamydia</i>         | 391                                          | 86                        | 4.55                                                      |
| <i>Xanthomonas</i>       | 66                                           | 15                        | 4.40                                                      |
| <i>Zymomonas</i>         | 26                                           | 6                         | 4.33                                                      |
| <i>Bordetella</i>        | 17                                           | 10                        | 1.70                                                      |
| <i>Sulfolobus</i>        | 20                                           | 17                        | 1.18                                                      |
| <i>Thermococcus</i>      | 8                                            | 9                         | 0.89                                                      |
| <i>Streptomyces</i>      | 4                                            | 19                        | 0.21                                                      |
| <i>Streptococcus</i>     | 1                                            | 123                       | 0.01                                                      |
