# Supplementary material for: k-mer Similarity, Networks of Microbial Genomes, and Taxonomic Rank
Source: PubMed Central journal article supplement (PMC6247013; doi:10.1128/msystems.00257-18), 2018-11-20
Supplement: sys006182296st3.pdf [file sys006182296st3.pdf]

**Table S3.** Number of core *k*-mers in 112 genera of prokaryotes, based on their annotated function in COG functional categories.

| Phylum              | Genus                    | No. isolates | COG functional category |   |     |    |     |    |     |    |    |    |    |    |    |    |    |     |    |     |     |    |    |    |   |   |   |  |
|---------------------|--------------------------|--------------|-------------------------|---|-----|----|-----|----|-----|----|----|----|----|----|----|----|----|-----|----|-----|-----|----|----|----|---|---|---|--|
|                     |                          |              | A                       | B | C   | D  | E   | F  | G   | H  | I  | J  | K  | L  | M  | N  | O  | P   | Q  | R   | S   | T  | U  | V  | W | Y | Z |  |
| Actinobacteria      | <i>Clavibacter</i>       | 150          | 2                       | 0 | 46  | 11 | 94  | 40 | 96  | 52 | 34 | 39 | 41 | 54 | 51 | 1  | 40 | 77  | 24 | 123 | 102 | 34 | 21 | 13 | 1 | 0 | 0 |  |
| Actinobacteria      | <i>Nocardia</i>          | 115          | 1                       | 0 | 69  | 11 | 87  | 29 | 50  | 54 | 33 | 45 | 30 | 43 | 36 | 0  | 35 | 41  | 19 | 78  | 50  | 22 | 15 | 8  | 0 | 0 | 0 |  |
| Actinobacteria      | <i>Actinoplanes</i>      | 114          | 0                       | 0 | 45  | 8  | 38  | 20 | 37  | 22 | 10 | 22 | 22 | 26 | 17 | 0  | 19 | 28  | 6  | 38  | 19  | 20 | 7  | 5  | 0 | 0 | 0 |  |
| Actinobacteria      | <i>Amycolatopsis</i>     | 102          | 1                       | 0 | 91  | 13 | 124 | 49 | 94  | 66 | 40 | 38 | 58 | 61 | 59 | 1  | 51 | 74  | 35 | 157 | 110 | 36 | 15 | 15 | 0 | 0 | 0 |  |
| Actinobacteria      | <i>Gordonia</i>          | 61           | 0                       | 0 | 36  | 7  | 49  | 13 | 28  | 31 | 27 | 29 | 17 | 24 | 19 | 0  | 26 | 23  | 9  | 35  | 26  | 11 | 5  | 5  | 0 | 0 | 0 |  |
| Actinobacteria      | <i>Rhodococcus</i>       | 35           | 0                       | 0 | 10  | 3  | 9   | 3  | 6   | 1  | 7  | 6  | 6  | 6  | 4  | 0  | 7  | 2   | 3  | 4   | 1   | 3  | 1  | 0  | 0 | 0 | 0 |  |
| Actinobacteria      | <i>Frankia</i>           | 33           | 0                       | 0 | 3   | 1  | 1   | 1  | 6   | 1  | 4  | 2  | 3  | 3  | 5  | 0  | 1  | 2   | 4  | 5   | 4   | 4  | 1  | 2  | 0 | 0 | 0 |  |
| Actinobacteria      | <i>Arthrobacter</i>      | 25           | 0                       | 0 | 6   | 0  | 9   | 0  | 4   | 2  | 1  | 6  | 1  | 1  | 0  | 0  | 3  | 8   | 1  | 2   | 1   | 1  | 0  | 2  | 0 | 0 | 0 |  |
| Actinobacteria      | <i>Streptomyces</i>      | 16           | 0                       | 0 | 0   | 0  | 7   | 0  | 1   | 1  | 0  | 0  | 0  | 0  | 0  | 0  | 6  | 0   | 0  | 0   | 0   | 0  | 0  | 3  | 0 | 0 | 0 |  |
| Actinobacteria      | <i>Gardnerella</i>       | 2            | 0                       | 0 | 0   | 0  | 0   | 0  | 0   | 0  | 0  | 1  | 0  | 0  | 0  | 0  | 0  | 1   | 1  | 1   | 0   | 0  | 0  | 0  | 0 | 0 | 0 |  |
| Alphaproteobacteria | <i>Azospirillum</i>      | 107          | 0                       | 0 | 68  | 15 | 76  | 12 | 47  | 28 | 20 | 17 | 18 | 38 | 42 | 12 | 33 | 45  | 12 | 54  | 49  | 52 | 20 | 14 | 0 | 0 | 0 |  |
| Alphaproteobacteria | <i>Acetobacter</i>       | 82           | 1                       | 0 | 106 | 20 | 135 | 52 | 73  | 98 | 40 | 54 | 44 | 79 | 88 | 1  | 77 | 81  | 20 | 143 | 157 | 30 | 29 | 16 | 1 | 0 | 0 |  |
| Alphaproteobacteria | <i>Phaeobacter</i>       | 82           | 0                       | 0 | 10  | 3  | 44  | 3  | 10  | 15 | 10 | 7  | 15 | 20 | 8  | 8  | 13 | 16  | 4  | 15  | 7   | 7  | 5  | 2  | 0 | 0 | 0 |  |
| Alphaproteobacteria | <i>Caulobacter</i>       | 73           | 1                       | 0 | 36  | 6  | 38  | 6  | 19  | 21 | 25 | 21 | 10 | 20 | 22 | 4  | 22 | 19  | 14 | 31  | 28  | 16 | 16 | 6  | 0 | 0 | 0 |  |
| Alphaproteobacteria | <i>Mesorhizobium</i>     | 71           | 0                       | 0 | 14  | 2  | 30  | 4  | 14  | 14 | 5  | 5  | 9  | 13 | 12 | 0  | 12 | 23  | 6  | 30  | 13  | 11 | 2  | 6  | 0 | 0 | 0 |  |
| Alphaproteobacteria | <i>Sinorhizobium</i>     | 64           | 0                       | 0 | 53  | 5  | 67  | 16 | 45  | 27 | 17 | 19 | 17 | 18 | 12 | 8  | 24 | 34  | 7  | 66  | 36  | 18 | 19 | 7  | 0 | 0 | 0 |  |
| Alphaproteobacteria | <i>Bradyrhizobium</i>    | 62           | 0                       | 0 | 2   | 0  | 13  | 0  | 7   | 5  | 1  | 1  | 2  | 12 | 4  | 0  | 7  | 17  | 1  | 17  | 6   | 15 | 2  | 6  | 0 | 0 | 0 |  |
| Alphaproteobacteria | <i>Oligotropha</i>       | 57           | 0                       | 0 | 4   | 0  | 14  | 1  | 9   | 3  | 1  | 3  | 6  | 20 | 7  | 0  | 4  | 22  | 2  | 16  | 9   | 11 | 3  | 5  | 0 | 0 | 0 |  |
| Alphaproteobacteria | <i>Rhodobacter</i>       | 55           | 0                       | 0 | 32  | 4  | 27  | 13 | 26  | 16 | 11 | 7  | 6  | 14 | 12 | 1  | 10 | 18  | 4  | 15  | 7   | 2  | 4  | 5  | 0 | 0 | 0 |  |
| Alphaproteobacteria | <i>Sphingobium</i>       | 50           | 0                       | 0 | 22  | 2  | 13  | 4  | 6   | 8  | 12 | 8  | 1  | 7  | 5  | 0  | 22 | 8   | 1  | 7   | 5   | 9  | 6  | 3  | 0 | 0 | 0 |  |
| Alphaproteobacteria | <i>Rhodopseudomonas</i>  | 43           | 0                       | 0 | 2   | 1  | 8   | 1  | 1   | 3  | 2  | 2  | 0  | 7  | 4  | 0  | 4  | 8   | 1  | 11  | 5   | 7  | 2  | 5  | 0 | 0 | 0 |  |
| Alphaproteobacteria | <i>Rhizobium</i>         | 39           | 0                       | 0 | 11  | 2  | 13  | 1  | 4   | 7  | 1  | 4  | 2  | 4  | 0  | 0  | 8  | 11  | 1  | 9   | 0   | 4  | 0  | 8  | 0 | 0 | 0 |  |
| Alphaproteobacteria | <i>Methylobacterium</i>  | 33           | 0                       | 0 | 12  | 2  | 5   | 2  | 6   | 3  | 0  | 3  | 0  | 1  | 7  | 0  | 5  | 4   | 1  | 7   | 4   | 9  | 2  | 2  | 0 | 0 | 0 |  |
| Alphaproteobacteria | <i>Agrobacterium</i>     | 30           | 0                       | 0 | 17  | 1  | 15  | 4  | 3   | 4  | 1  | 4  | 1  | 7  | 2  | 0  | 5  | 11  | 1  | 9   | 1   | 3  | 3  | 5  | 0 | 0 | 0 |  |
| Alphaproteobacteria | <i>Rhodospirillum</i>    | 29           | 0                       | 0 | 3   | 2  | 6   | 5  | 1   | 1  | 4  | 0  | 0  | 2  | 1  | 0  | 0  | 9   | 0  | 2   | 1   | 5  | 0  | 2  | 0 | 0 | 0 |  |
| Alphaproteobacteria | <i>Bruceella</i>         | 26           | 0                       | 0 | 6   | 0  | 10  | 2  | 14  | 6  | 5  | 3  | 7  | 12 | 6  | 0  | 6  | 11  | 0  | 15  | 9   | 3  | 1  | 5  | 0 | 0 | 0 |  |
| Alphaproteobacteria | <i>Gluconacetobacter</i> | 21           | 0                       | 0 | 16  | 1  | 8   | 3  | 12  | 11 | 7  | 7  | 8  | 9  | 7  | 0  | 5  | 11  | 2  | 11  | 8   | 3  | 8  | 3  | 0 | 0 | 0 |  |
| Alphaproteobacteria | <i>Hyphomicrobium</i>    | 6            | 0                       | 0 | 4   | 0  | 1   | 1  | 1   | 0  | 0  | 1  | 0  | 0  | 0  | 0  | 0  | 0   | 0  | 0   | 0   | 0  | 1  | 0  | 0 | 0 | 0 |  |
| Alphaproteobacteria | <i>Ehrlichia</i>         | 2            | 0                       | 0 | 1   | 0  | 1   | 0  | 2   | 4  | 1  | 1  | 1  | 0  | 0  | 0  | 2  | 1   | 0  | 0   | 1   | 0  | 2  | 0  | 0 | 0 | 0 |  |
| Alphaproteobacteria | <i>Wolbachia</i>         | 2            | 0                       | 0 | 0   | 0  | 1   | 1  | 0   | 0  | 1  | 0  | 0  | 0  | 0  | 0  | 0  | 0   | 0  | 0   | 0   | 0  | 0  | 0  | 0 | 0 | 0 |  |
| Alphaproteobacteria | <i>Bartonella</i>        | 1            | 0                       | 0 | 0   | 0  | 1   | 0  | 0   | 0  | 0  | 0  | 0  | 0  | 0  | 0  | 0  | 0   | 0  | 0   | 0   | 0  | 0  | 0  | 0 | 0 | 0 |  |
| Alphaproteobacteria | <i>Zymomonas</i>         | 1            | 0                       | 0 | 0   | 0  | 0   | 0  | 0   | 0  | 1  | 0  | 0  | 0  | 0  | 0  | 0  | 0   | 0  | 0   | 0   | 0  | 0  | 0  | 0 | 0 | 0 |  |
| Bacteroidetes       | <i>Porphyromonas</i>     | 6            | 0                       | 0 | 0   | 0  | 1   | 1  | 0   | 0  | 0  | 1  | 1  | 0  | 0  | 0  | 4  | 0   | 0  | 0   | 2   | 0  | 0  | 0  | 0 | 0 | 0 |  |
| Bacteroidetes       | <i>Flavobacterium</i>    | 2            | 0                       | 0 | 0   | 0  | 0   | 0  | 0   | 0  | 0  | 0  | 0  | 0  | 0  | 0  | 0  | 0   | 2  | 0   | 0   | 0  | 0  | 0  | 0 | 0 | 0 |  |
| Bacteroidetes       | <i>Riemerella</i>        | 1            | 0                       | 0 | 0   | 0  | 0   | 0  | 0   | 0  | 0  | 0  | 1  | 0  | 0  | 0  | 0  | 0   | 0  | 0   | 0   | 0  | 0  | 0  | 0 | 0 | 0 |  |
| Betaproteobacteria  | <i>Variovorax</i>        | 184          | 1                       | 0 | 126 | 20 | 163 | 48 | 109 | 78 | 52 | 72 | 54 | 82 | 92 | 5  | 73 | 112 | 41 | 230 | 204 | 59 | 50 | 19 | 0 | 0 | 0 |  |

| Phylum                | Genus                        | No. isolates | COG functional category |   |     |    |     |    |     |     |    |     |    |     |     |    |     |     |    |     |     |     |     |    |   |   |   |  |
|-----------------------|------------------------------|--------------|-------------------------|---|-----|----|-----|----|-----|-----|----|-----|----|-----|-----|----|-----|-----|----|-----|-----|-----|-----|----|---|---|---|--|
|                       |                              |              | A                       | B | C   | D  | E   | F  | G   | H   | I  | J   | K  | L   | M   | N  | O   | P   | Q  | R   | S   | T   | U   | V  | W | Y | Z |  |
| Betaproteobacteria    | <i>Achromobacter</i>         | 115          | 0                       | 0 | 58  | 6  | 81  | 22 | 42  | 34  | 35 | 30  | 35 | 30  | 52  | 20 | 48  | 62  | 28 | 100 | 97  | 27  | 33  | 13 | 0 | 0 | 0 |  |
| Betaproteobacteria    | <i>Cupriavidus</i>           | 110          | 1                       | 0 | 126 | 16 | 130 | 44 | 53  | 77  | 41 | 80  | 36 | 56  | 67  | 12 | 57  | 77  | 23 | 134 | 111 | 43  | 41  | 16 | 0 | 0 | 0 |  |
| Betaproteobacteria    | <i>Acidovorax</i>            | 38           | 0                       | 0 | 34  | 4  | 40  | 11 | 9   | 13  | 11 | 12  | 7  | 14  | 7   | 5  | 10  | 18  | 8  | 19  | 17  | 14  | 18  | 4  | 0 | 0 | 0 |  |
| Betaproteobacteria    | <i>Neisseria</i>             | 25           | 0                       | 0 | 2   | 1  | 4   | 0  | 3   | 4   | 1  | 2   | 1  | 14  | 11  | 0  | 3   | 8   | 3  | 8   | 9   | 1   | 4   | 3  | 0 | 0 | 0 |  |
| Betaproteobacteria    | <i>Bordetella</i>            | 14           | 0                       | 0 | 0   | 0  | 3   | 0  | 1   | 1   | 0  | 1   | 0  | 0   | 0   | 0  | 1   | 6   | 0  | 6   | 0   | 0   | 0   | 1  | 0 | 0 | 0 |  |
| Betaproteobacteria    | <i>Ralstonia</i>             | 6            | 0                       | 0 | 0   | 0  | 0   | 0  | 0   | 0   | 0  | 3   | 0  | 0   | 0   | 0  | 0   | 0   | 0  | 0   | 0   | 4   | 0   | 0  | 0 | 0 | 0 |  |
| Betaproteobacteria    | <i>Taylorella</i>            | 6            | 0                       | 0 | 14  | 2  | 13  | 1  | 3   | 3   | 1  | 8   | 3  | 5   | 7   | 0  | 4   | 8   | 2  | 10  | 13  | 5   | 2   | 2  | 0 | 0 | 0 |  |
| Betaproteobacteria    | <i>Nitrosomonas</i>          | 1            | 0                       | 0 | 0   | 0  | 0   | 0  | 0   | 0   | 0  | 0   | 1  | 0   | 0   | 0  | 0   | 0   | 0  | 0   | 0   | 0   | 0   | 0  | 0 | 0 | 0 |  |
| Chloroflexi           | <i>Chloroflexus</i>          | 12           | 0                       | 0 | 35  | 3  | 31  | 4  | 36  | 19  | 10 | 6   | 11 | 17  | 13  | 0  | 16  | 19  | 8  | 38  | 15  | 10  | 7   | 5  | 0 | 0 | 0 |  |
| Chloroflexi           | <i>Dehalococcoides</i>       | 7            | 0                       | 1 | 42  | 7  | 63  | 35 | 19  | 40  | 17 | 28  | 24 | 43  | 14  | 0  | 24  | 21  | 5  | 57  | 37  | 9   | 15  | 2  | 0 | 0 | 0 |  |
| Crenarchaeota         | <i>Desulfurococcus</i>       | 2            | 0                       | 0 | 4   | 0  | 7   | 2  | 3   | 1   | 0  | 5   | 4  | 7   | 0   | 0  | 4   | 2   | 0  | 15  | 3   | 2   | 1   | 0  | 0 | 0 | 0 |  |
| Cyanobacteria         | <i>Synechocystis</i>         | 223          | 0                       | 0 | 67  | 6  | 76  | 29 | 52  | 43  | 25 | 29  | 17 | 34  | 36  | 0  | 33  | 50  | 13 | 63  | 51  | 24  | 16  | 9  | 0 | 0 | 0 |  |
| Cyanobacteria         | <i>Anabaena</i>              | 8            | 0                       | 0 | 14  | 3  | 11  | 3  | 9   | 9   | 2  | 4   | 3  | 5   | 5   | 0  | 3   | 12  | 6  | 17  | 11  | 3   | 1   | 2  | 0 | 0 | 0 |  |
| Cyanobacteria         | <i>Nostoc</i>                | 6            | 0                       | 0 | 3   | 0  | 3   | 1  | 3   | 2   | 1  | 0   | 2  | 1   | 0   | 0  | 0   | 5   | 1  | 5   | 0   | 0   | 0   | 0  | 0 | 0 | 0 |  |
| Deinococcus-Thermus   | <i>Meiothermus</i>           | 36           | 0                       | 0 | 15  | 4  | 14  | 5  | 10  | 7   | 7  | 6   | 5  | 17  | 3   | 1  | 7   | 18  | 5  | 22  | 14  | 6   | 6   | 5  | 0 | 0 | 0 |  |
| Deinococcus-Thermus   | <i>Thermus</i>               | 13           | 0                       | 0 | 2   | 2  | 4   | 0  | 3   | 1   | 1  | 1   | 1  | 3   | 1   | 0  | 0   | 2   | 1  | 2   | 0   | 0   | 0   | 2  | 0 | 0 | 0 |  |
| Deltaproteobacteria   | <i>Myxococcus</i>            | 89           | 1                       | 0 | 45  | 12 | 60  | 31 | 34  | 42  | 35 | 33  | 28 | 61  | 67  | 3  | 43  | 49  | 15 | 105 | 65  | 50  | 56  | 9  | 0 | 0 | 1 |  |
| Deltaproteobacteria   | <i>Anaeromyxobacter</i>      | 74           | 0                       | 0 | 77  | 14 | 62  | 27 | 44  | 35  | 32 | 29  | 28 | 53  | 49  | 0  | 48  | 44  | 15 | 91  | 58  | 44  | 36  | 10 | 0 | 0 | 0 |  |
| Deltaproteobacteria   | <i>Bdellovibrio</i>          | 3            | 0                       | 0 | 9   | 0  | 1   | 0  | 2   | 0   | 0  | 2   | 1  | 4   | 1   | 0  | 0   | 1   | 0  | 3   | 0   | 2   | 0   | 1  | 0 | 0 | 0 |  |
| Epsilonproteobacteria | <i>Arcobacter</i>            | 4            | 0                       | 0 | 13  | 0  | 10  | 5  | 3   | 11  | 3  | 9   | 7  | 7   | 4   | 2  | 6   | 2   | 0  | 7   | 5   | 6   | 4   | 0  | 0 | 0 | 0 |  |
| Euryarchaeota         | <i>Haloarcula</i>            | 91           | 0                       | 2 | 85  | 11 | 112 | 44 | 55  | 91  | 36 | 55  | 45 | 67  | 24  | 5  | 52  | 74  | 18 | 196 | 174 | 35  | 20  | 13 | 0 | 0 | 0 |  |
| Euryarchaeota         | <i>Methanosarcina</i>        | 3            | 0                       | 0 | 12  | 0  | 9   | 5  | 3   | 20  | 1  | 9   | 8  | 16  | 2   | 0  | 5   | 2   | 3  | 13  | 15  | 4   | 1   | 1  | 0 | 0 | 0 |  |
| Euryarchaeota         | <i>Methanobrevibacter</i>    | 1            | 0                       | 0 | 1   | 0  | 0   | 1  | 0   | 3   | 0  | 0   | 0  | 0   | 0   | 0  | 1   | 0   | 0  | 1   | 0   | 0   | 0   | 0  | 0 | 0 | 0 |  |
| Euryarchaeota         | <i>Methanocaldococcus</i>    | 1            | 0                       | 0 | 0   | 0  | 0   | 0  | 0   | 0   | 0  | 0   | 0  | 0   | 0   | 0  | 1   | 0   | 0  | 0   | 0   | 0   | 0   | 0  | 0 | 0 | 0 |  |
| Euryarchaeota         | <i>Methanocella</i>          | 1            | 0                       | 0 | 4   | 0  | 2   | 1  | 1   | 0   | 1  | 0   | 1  | 0   | 0   | 0  | 0   | 1   | 0  | 1   | 0   | 0   | 0   | 0  | 0 | 0 | 0 |  |
| Euryarchaeota         | <i>Methanosaeta</i>          | 1            | 0                       | 0 | 2   | 0  | 0   | 0  | 0   | 0   | 1  | 0   | 0  | 0   | 0   | 0  | 1   | 0   | 0  | 0   | 0   | 0   | 0   | 0  | 0 | 0 | 0 |  |
| Euryarchaeota         | <i>Pyrococcus</i>            | 1            | 0                       | 0 | 1   | 0  | 0   | 0  | 0   | 0   | 0  | 0   | 0  | 0   | 0   | 0  | 0   | 0   | 0  | 0   | 0   | 0   | 0   | 0  | 0 | 0 | 0 |  |
| Firmicutes            | <i>Thermoanaerobacterium</i> | 15           | 0                       | 0 | 31  | 12 | 47  | 18 | 43  | 20  | 8  | 22  | 28 | 43  | 35  | 8  | 16  | 17  | 4  | 60  | 52  | 21  | 20  | 4  | 0 | 0 | 0 |  |
| Firmicutes            | <i>Carnobacterium</i>        | 13           | 0                       | 0 | 2   | 3  | 3   | 2  | 9   | 1   | 1  | 10  | 4  | 3   | 0   | 0  | 4   | 1   | 1  | 4   | 3   | 0   | 1   | 0  | 0 | 0 | 0 |  |
| Firmicutes            | <i>Roseburia</i>             | 13           | 0                       | 0 | 9   | 1  | 21  | 8  | 33  | 2   | 8  | 8   | 7  | 16  | 8   | 6  | 11  | 9   | 0  | 16  | 10  | 12  | 4   | 5  | 0 | 0 | 0 |  |
| Firmicutes            | <i>Desulfitobacterium</i>    | 8            | 0                       | 0 | 38  | 4  | 25  | 9  | 8   | 5   | 6  | 19  | 15 | 13  | 15  | 4  | 7   | 11  | 2  | 27  | 26  | 14  | 8   | 2  | 0 | 0 | 0 |  |
| Firmicutes            | <i>Pediococcus</i>           | 8            | 0                       | 0 | 2   | 0  | 4   | 1  | 9   | 0   | 3  | 4   | 4  | 4   | 2   | 0  | 2   | 2   | 0  | 6   | 4   | 1   | 1   | 1  | 0 | 0 | 0 |  |
| Firmicutes            | <i>Lactococcus</i>           | 7            | 0                       | 0 | 5   | 0  | 0   | 1  | 8   | 0   | 1  | 5   | 3  | 2   | 1   | 0  | 1   | 1   | 0  | 2   | 1   | 0   | 2   | 0  | 0 | 0 | 0 |  |
| Firmicutes            | <i>Desulfosporosinus</i>     | 6            | 0                       | 0 | 0   | 0  | 0   | 1  | 0   | 0   | 0  | 1   | 0  | 0   | 1   | 0  | 1   | 0   | 0  | 0   | 2   | 0   | 0   | 0  | 0 | 0 | 0 |  |
| Firmicutes            | <i>Geobacillus</i>           | 4            | 0                       | 0 | 2   | 1  | 3   | 0  | 0   | 2   | 0  | 1   | 2  | 1   | 3   | 0  | 0   | 0   | 0  | 0   | 1   | 1   | 1   | 0  | 0 | 0 | 0 |  |
| Firmicutes            | <i>Caldicellulosiruptor</i>  | 2            | 0                       | 0 | 0   | 0  | 2   | 0  | 0   | 0   | 0  | 0   | 2  | 8   | 1   | 0  | 0   | 0   | 0  | 0   | 1   | 0   | 0   | 1  | 0 | 0 | 0 |  |
| Firmicutes            | <i>Exiguobacterium</i>       | 2            | 0                       | 0 | 4   | 0  | 0   | 1  | 8   | 0   | 0  | 2   | 0  | 0   | 1   | 0  | 1   | 1   | 0  | 1   | 0   | 0   | 0   | 0  | 0 | 0 | 0 |  |
| Firmicutes            | <i>Thermoanaerobacter</i>    | 2            | 0                       | 0 | 1   | 0  | 1   | 0  | 0   | 1   | 0  | 0   | 0  | 5   | 2   | 0  | 0   | 0   | 0  | 1   | 1   | 0   | 0   | 0  | 0 | 0 | 0 |  |
| Gammaproteobacteria   | <i>Azotobacter</i>           | 284          | 2                       | 0 | 219 | 40 | 225 | 79 | 159 | 136 | 81 | 108 | 90 | 150 | 140 | 26 | 127 | 181 | 62 | 372 | 442 | 105 | 118 | 33 | 0 | 0 | 1 |  |

| Phylum              | Genus                    | No. isolates | COG functional category |   |     |    |     |    |     |     |    |     |    |     |     |    |     |     |    |     |     |    |     |    |   |   |   |  |
|---------------------|--------------------------|--------------|-------------------------|---|-----|----|-----|----|-----|-----|----|-----|----|-----|-----|----|-----|-----|----|-----|-----|----|-----|----|---|---|---|--|
|                     |                          |              | A                       | B | C   | D  | E   | F  | G   | H   | I  | J   | K  | L   | M   | N  | O   | P   | Q  | R   | S   | T  | U   | V  | W | Y | Z |  |
| Gammaproteobacteria | <i>Stenotrophomonas</i>  | 174          | 2                       | 0 | 183 | 36 | 203 | 78 | 109 | 112 | 80 | 96  | 77 | 122 | 145 | 25 | 118 | 138 | 43 | 264 | 283 | 89 | 103 | 26 | 1 | 0 | 0 |  |
| Gammaproteobacteria | <i>Edwardsiella</i>      | 129          | 1                       | 0 | 170 | 35 | 171 | 84 | 142 | 118 | 56 | 182 | 68 | 125 | 137 | 19 | 87  | 124 | 22 | 213 | 239 | 69 | 73  | 19 | 0 | 0 | 0 |  |
| Gammaproteobacteria | <i>Rahnella</i>          | 89           | 1                       | 0 | 180 | 42 | 234 | 88 | 206 | 136 | 63 | 200 | 90 | 130 | 145 | 22 | 111 | 167 | 30 | 293 | 296 | 79 | 79  | 25 | 1 | 0 | 0 |  |
| Gammaproteobacteria | <i>Shigella</i>          | 68           | 0                       | 0 | 74  | 9  | 101 | 49 | 66  | 62  | 32 | 46  | 43 | 68  | 87  | 1  | 38  | 81  | 25 | 107 | 128 | 49 | 23  | 21 | 1 | 0 | 0 |  |
| Gammaproteobacteria | <i>Cronobacter</i>       | 52           | 0                       | 0 | 4   | 0  | 7   | 0  | 9   | 3   | 2  | 4   | 3  | 2   | 6   | 1  | 1   | 15  | 3  | 9   | 7   | 6  | 2   | 4  | 0 | 0 | 0 |  |
| Gammaproteobacteria | <i>Pectobacterium</i>    | 50           | 1                       | 0 | 49  | 14 | 77  | 31 | 84  | 42  | 19 | 116 | 46 | 35  | 49  | 0  | 40  | 55  | 16 | 95  | 88  | 22 | 25  | 7  | 0 | 0 | 0 |  |
| Gammaproteobacteria | <i>Xylella</i>           | 46           | 1                       | 0 | 67  | 17 | 86  | 31 | 43  | 43  | 30 | 37  | 32 | 46  | 66  | 0  | 54  | 40  | 12 | 90  | 84  | 25 | 40  | 15 | 1 | 0 | 0 |  |
| Gammaproteobacteria | <i>Aeromonas</i>         | 32           | 0                       | 0 | 24  | 3  | 30  | 11 | 23  | 8   | 3  | 6   | 21 | 12  | 12  | 7  | 15  | 29  | 1  | 30  | 14  | 26 | 21  | 7  | 0 | 0 | 0 |  |
| Gammaproteobacteria | <i>Erwinia</i>           | 32           | 0                       | 0 | 22  | 3  | 18  | 7  | 12  | 8   | 0  | 78  | 13 | 17  | 4   | 0  | 6   | 15  | 1  | 4   | 13  | 9  | 12  | 1  | 0 | 0 | 0 |  |
| Gammaproteobacteria | <i>Thioalkalivibrio</i>  | 29           | 0                       | 0 | 5   | 2  | 5   | 3  | 4   | 2   | 1  | 5   | 0  | 2   | 2   | 0  | 1   | 5   | 2  | 1   | 1   | 0  | 2   | 2  | 0 | 0 | 1 |  |
| Gammaproteobacteria | <i>Pasteurella</i>       | 28           | 0                       | 0 | 30  | 6  | 20  | 7  | 31  | 8   | 5  | 35  | 10 | 7   | 10  | 0  | 7   | 14  | 4  | 33  | 23  | 6  | 6   | 1  | 1 | 0 | 0 |  |
| Gammaproteobacteria | <i>Coxiella</i>          | 20           | 0                       | 0 | 4   | 0  | 13  | 4  | 8   | 7   | 6  | 6   | 2  | 19  | 8   | 0  | 4   | 8   | 1  | 15  | 15  | 0  | 9   | 6  | 0 | 0 | 0 |  |
| Gammaproteobacteria | <i>Klebsiella</i>        | 20           | 0                       | 0 | 3   | 0  | 1   | 1  | 5   | 1   | 0  | 5   | 1  | 0   | 2   | 0  | 2   | 2   | 0  | 5   | 0   | 2  | 0   | 0  | 0 | 0 | 0 |  |
| Gammaproteobacteria | <i>Aggregatibacter</i>   | 17           | 0                       | 0 | 21  | 8  | 22  | 7  | 14  | 16  | 4  | 13  | 6  | 20  | 21  | 0  | 8   | 9   | 1  | 25  | 15  | 3  | 14  | 3  | 0 | 0 | 0 |  |
| Gammaproteobacteria | <i>Dickeya</i>           | 11           | 0                       | 0 | 1   | 0  | 2   | 2  | 3   | 0   | 0  | 6   | 0  | 0   | 0   | 0  | 0   | 2   | 0  | 0   | 3   | 3  | 0   | 0  | 0 | 0 | 0 |  |
| Gammaproteobacteria | <i>Alteromonas</i>       | 10           | 0                       | 0 | 27  | 3  | 8   | 7  | 1   | 4   | 5  | 24  | 8  | 8   | 1   | 0  | 9   | 0   | 0  | 17  | 8   | 4  | 4   | 0  | 0 | 0 | 0 |  |
| Gammaproteobacteria | <i>Marinobacter</i>      | 10           | 0                       | 0 | 9   | 1  | 6   | 3  | 2   | 4   | 3  | 7   | 3  | 4   | 2   | 0  | 2   | 3   | 1  | 6   | 0   | 2  | 3   | 0  | 0 | 0 | 0 |  |
| Gammaproteobacteria | <i>Pseudoalteromonas</i> | 10           | 0                       | 0 | 5   | 0  | 0   | 0  | 0   | 1   | 0  | 10  | 0  | 0   | 0   | 0  | 0   | 0   | 0  | 1   | 1   | 0  | 0   | 0  | 0 | 0 | 0 |  |
| Gammaproteobacteria | <i>Salmonella</i>        | 10           | 0                       | 0 | 0   | 1  | 1   | 1  | 2   | 2   | 0  | 3   | 1  | 2   | 0   | 0  | 3   | 0   | 0  | 1   | 0   | 1  | 0   | 2  | 0 | 0 | 0 |  |
| Gammaproteobacteria | <i>Yersinia</i>          | 10           | 0                       | 0 | 0   | 0  | 1   | 1  | 2   | 1   | 0  | 2   | 1  | 0   | 0   | 0  | 0   | 2   | 0  | 1   | 1   | 2  | 0   | 0  | 0 | 0 | 0 |  |
| Gammaproteobacteria | <i>Psychrobacter</i>     | 7            | 0                       | 0 | 11  | 1  | 4   | 4  | 1   | 4   | 3  | 6   | 4  | 0   | 2   | 0  | 5   | 1   | 1  | 0   | 3   | 1  | 0   | 0  | 0 | 0 | 0 |  |
| Gammaproteobacteria | <i>Actinobacillus</i>    | 6            | 0                       | 0 | 3   | 0  | 6   | 1  | 2   | 1   | 2  | 2   | 1  | 3   | 0   | 0  | 2   | 0   | 0  | 2   | 0   | 0  | 0   | 0  | 0 | 0 | 0 |  |
| Gammaproteobacteria | <i>Glaciecola</i>        | 6            | 0                       | 0 | 2   | 0  | 0   | 0  | 0   | 1   | 1  | 2   | 1  | 0   | 0   | 0  | 0   | 0   | 0  | 0   | 0   | 0  | 0   | 0  | 0 | 0 | 0 |  |
| Gammaproteobacteria | <i>Mannheimia</i>        | 6            | 0                       | 0 | 0   | 0  | 0   | 2  | 0   | 0   | 0  | 5   | 0  | 0   | 1   | 0  | 0   | 0   | 0  | 0   | 0   | 1  | 0   | 0  | 0 | 0 | 0 |  |
| Gammaproteobacteria | <i>Nitrosococcus</i>     | 6            | 0                       | 0 | 6   | 2  | 4   | 2  | 7   | 6   | 0  | 3   | 2  | 11  | 7   | 0  | 4   | 6   | 0  | 3   | 2   | 1  | 3   | 0  | 0 | 0 | 0 |  |
| Gammaproteobacteria | <i>Pantoea</i>           | 6            | 0                       | 0 | 0   | 0  | 0   | 0  | 0   | 0   | 0  | 4   | 0  | 0   | 0   | 0  | 0   | 0   | 0  | 1   | 0   | 1  | 0   | 0  | 0 | 0 | 0 |  |
| Gammaproteobacteria | <i>Xanthomonas</i>       | 6            | 0                       | 0 | 0   | 0  | 0   | 0  | 0   | 0   | 0  | 2   | 0  | 0   | 0   | 0  | 0   | 0   | 0  | 1   | 0   | 0  | 4   | 0  | 0 | 0 | 0 |  |
| Gammaproteobacteria | <i>Marinomonas</i>       | 3            | 0                       | 0 | 6   | 0  | 1   | 0  | 1   | 1   | 1  | 0   | 0  | 1   | 0   | 0  | 1   | 2   | 0  | 1   | 0   | 1  | 2   | 0  | 0 | 0 | 0 |  |
| Gammaproteobacteria | <i>Acidithiobacillus</i> | 2            | 0                       | 0 | 4   | 1  | 3   | 3  | 1   | 0   | 1  | 3   | 3  | 6   | 1   | 0  | 0   | 2   | 0  | 1   | 1   | 2  | 1   | 0  | 0 | 0 | 0 |  |
| Gammaproteobacteria | <i>Enterobacter</i>      | 2            | 0                       | 0 | 0   | 0  | 0   | 0  | 0   | 0   | 0  | 2   | 0  | 0   | 0   | 0  | 0   | 0   | 0  | 0   | 0   | 0  | 0   | 0  | 0 | 0 | 0 |  |
| Gammaproteobacteria | <i>Escherichia</i>       | 2            | 0                       | 0 | 0   | 0  | 0   | 0  | 0   | 0   | 0  | 2   | 0  | 0   | 0   | 0  | 0   | 0   | 0  | 0   | 0   | 0  | 0   | 0  | 0 | 0 | 0 |  |
| Gammaproteobacteria | <i>Francisella</i>       | 1            | 0                       | 0 | 0   | 0  | 2   | 0  | 1   | 2   | 0  | 0   | 0  | 2   | 0   | 0  | 1   | 0   | 0  | 1   | 0   | 0  | 0   | 0  | 0 | 0 | 0 |  |
| Gammaproteobacteria | <i>Serratia</i>          | 1            | 0                       | 0 | 0   | 0  | 0   | 0  | 0   | 0   | 0  | 0   | 0  | 0   | 0   | 0  | 1   | 0   | 0  | 0   | 0   | 0  | 0   | 0  | 0 | 0 | 0 |  |
| Gammaproteobacteria | <i>Shewanella</i>        | 1            | 0                       | 0 | 3   | 0  | 0   | 0  | 0   | 0   | 0  | 0   | 0  | 0   | 0   | 0  | 0   | 0   | 0  | 0   | 0   | 0  | 0   | 0  | 0 | 0 | 0 |  |
| Spirochaetes        | <i>Brachyspira</i>       | 2            | 0                       | 0 | 0   | 0  | 0   | 0  | 0   | 0   | 0  | 0   | 0  | 0   | 0   | 0  | 0   | 0   | 1  | 0   | 1   | 2  | 0   | 0  | 0 | 0 | 0 |  |
| Tenericutes         | <i>Ureaplasma</i>        | 34           | 0                       | 0 | 17  | 7  | 21  | 19 | 20  | 12  | 8  | 27  | 15 | 44  | 9   | 0  | 18  | 23  | 1  | 40  | 28  | 5  | 11  | 7  | 0 | 0 | 0 |  |
| Thaumarchaeota      | <i>Nitrosopumilus</i>    | 2            | 0                       | 1 | 33  | 3  | 24  | 10 | 9   | 27  | 6  | 12  | 11 | 17  | 5   | 0  | 15  | 12  | 2  | 21  | 20  | 1  | 5   | 2  | 0 | 0 | 0 |  |
