# Supplementary material for: k-mer Similarity, Networks of Microbial Genomes, and Taxonomic Rank
Source: PubMed Central journal article supplement (PMC6247013; doi:10.1128/msystems.00257-18), 2018-11-20
Supplement: sys006182296st4.pdf [file sys006182296st4.pdf]

**Table S4.** Comparison of annotated core *k*-mers in each phylum against all annotated core *k*-mers, based on COG functional categories. Adjusted *p*-values are shown for each comparison, those  $\leq 0.05$  (highlighted in bold-face and red shade) are considered statistically significant.

| Phylum                | A     | B            | C            | D     | E              | F            | G              | H              | I              | J               | K            | L              | M              | N               | O            | P              | Q            | R              | S               | T              | U              | V              | W     | Y     | Z     |
|-----------------------|-------|--------------|--------------|-------|----------------|--------------|----------------|----------------|----------------|-----------------|--------------|----------------|----------------|-----------------|--------------|----------------|--------------|----------------|-----------------|----------------|----------------|----------------|-------|-------|-------|
| Actinobacteria        | 0.282 | 1.000        | 0.564        | 1.000 | <b>0.041</b>   | 0.216        | <b>5.13E-5</b> | 0.340          | <b>0.011</b>   | <b>0.046</b>    | <b>0.019</b> | 0.687          | 0.340          | <b>06.85E-8</b> | 1.000        | 0.687          | <b>0.001</b> | 1.000          | <b>6.05E-4</b>  | 0.431          | <b>3.51E-9</b> | 1.000          | 0.800 | 1.000 | 1.000 |
| Alphaproteobacteria   | 1.000 | 1.000        | 0.057        | 1.000 | <b>4.22E-5</b> | <b>0.030</b> | 1.000          | 0.154          | 0.154          | <b>7.04E-10</b> | 0.084        | 0.566          | 0.864          | 0.438           | <b>0.010</b> | <b>0.004</b>   | 0.753        | <b>0.010</b>   | <b>1.36E-8</b>  | <b>0.011</b>   | 0.072          | <b>1.76E-5</b> | 1.000 | 1.000 | 1.000 |
| Bacteroidetes         | 1.000 | 1.000        | 1.000        | 1.000 | 1.000          | 1.000        | 1.000          | 1.000          | 1.000          | 1.000           | 0.671        | 1.000          | 1.000          | 1.000           | 0.060        | 1.000          | 0.269        | 1.000          | 1.000           | 1.000          | 1.000          | 1.000          | 1.000 | 1.000 | 1.000 |
| Betaproteobacteria    | 1.000 | 1.000        | 0.665        | 0.289 | 0.208          | 0.208        | <b>0.006</b>   | 0.390          | 0.665          | 0.192           | 0.208        | <b>0.009</b>   | 0.665          | <b>0.009</b>    | 1.000        | 0.374          | <b>0.006</b> | 0.208          | 0.208           | 1.000          | 0.509          | 1.000          | 1.000 | 1.000 | 1.000 |
| Chloroflexi           | 1.000 | 0.245        | 0.277        | 1.000 | 0.135          | 0.135        | 0.896          | 0.109          | 0.896          | 0.245           | 0.531        | 0.165          | 0.109          | 0.109           | 0.896        | 0.245          | 1.000        | 0.826          | <b>0.019</b>    | 0.174          | 0.847          | 0.531          | 1.000 | 1.000 | 1.000 |
| Crenarchaeota         | 1.000 | 1.000        | 1.000        | 1.000 | 1.000          | 1.000        | 1.000          | 1.000          | 1.000          | 1.000           | 1.000        | 0.705          | 0.705          | 1.000           | 1.000        | 1.000          | 1.000        | 0.068          | 1.000           | 1.000          | 1.000          | 1.000          | 1.000 | 1.000 | 1.000 |
| Cyanobacteria         | 1.000 | 1.000        | 0.222        | 0.914 | 0.323          | 0.640        | 0.323          | 0.323          | 0.955          | 0.268           | 0.323        | 0.602          | 1.000          | 0.222           | 1.000        | 0.222          | 0.323        | 0.914          | 0.222           | 1.000          | 0.291          | 1.000          | 1.000 | 1.000 | 1.000 |
| Deinococcus-Thermus   | 1.000 | 1.000        | 1.000        | 0.345 | 1.000          | 1.000        | 1.000          | 1.000          | 1.000          | 0.687           | 1.000        | 0.271          | 0.318          | 1.000           | 1.000        | 0.345          | 0.686        | 1.000          | 0.686           | 1.000          | 1.000          | 0.271          | 1.000 | 1.000 | 1.000 |
| Deltaproteobacteria   | 0.873 | 1.000        | 0.934        | 0.873 | <b>0.013</b>   | 1.000        | <b>0.020</b>   | 0.382          | 0.089          | <b>0.007</b>    | 0.873        | 0.057          | <b>0.008</b>   | <b>0.046</b>    | 0.277        | 0.438          | 1.000        | 0.438          | <b>0.004</b>    | <b>1.06E-4</b> | <b>1.14E-5</b> | 0.873          | 1.000 | 1.000 | 0.288 |
| Epsilonproteobacteria | 1.000 | 1.000        | 0.545        | 0.732 | 1.000          | 0.732        | 0.578          | 0.545          | 1.000          | 0.578           | 0.545        | 0.931          | 0.931          | 0.545           | 0.815        | 0.545          | 0.641        | 0.578          | 0.545           | 0.641          | 0.901          | 0.732          | 1.000 | 1.000 | 1.000 |
| Euryarchaeota         | 1.000 | <b>0.032</b> | 0.792        | 0.187 | 0.792          | 0.792        | <b>0.004</b>   | <b>1.67E-5</b> | 0.792          | 0.414           | 0.792        | 0.792          | <b>4.88E-9</b> | 0.709           | 0.827        | 0.699          | 0.792        | <b>7.77E-6</b> | <b>1.07E-5</b>  | 0.337          | <b>7.49E-4</b> | 0.705          | 1.000 | 1.000 | 1.000 |
| Firmicutes            | 1.000 | 1.000        | 1.000        | 0.549 | 1.000          | 1.000        | <b>2.38E-5</b> | <b>1.01E-4</b> | 0.339          | 0.549           | <b>0.004</b> | <b>0.003</b>   | 0.549          | <b>0.002</b>    | 0.339        | <b>3.22E-4</b> | <b>0.003</b> | 0.549          | 0.482           | 0.549          | 1.000          | 0.944          | 1.000 | 1.000 | 1.000 |
| Gammaproteobacteria   | 0.914 | 0.210        | <b>0.029</b> | 0.210 | <b>2.21E-6</b> | 1.000        | 0.914          | <b>0.018</b>   | <b>6.47E-4</b> | <b>5.50E-15</b> | 0.462        | <b>0.021</b>   | <b>0.002</b>   | 0.177           | 0.072        | 0.210          | <b>0.009</b> | 0.210          | <b>6.59E-15</b> | 0.210          | <b>4.31E-5</b> | <b>0.029</b>   | 0.210 | 1.000 | 0.690 |
| Spirochaetes          | 1.000 | 1.000        | 1.000        | 1.000 | 1.000          | 1.000        | 1.000          | 1.000          | 1.000          | 1.000           | 1.000        | 1.000          | 1.000          | 1.000           | 1.000        | 1.000          | 1.000        | 1.000          | 1.000           | 1.000          | 0.146          | 1.000          | 1.000 | 1.000 | 1.000 |
| Tenericutes           | 1.000 | 1.000        | 0.180        | 0.550 | 0.182          | 0.180        | 1.000          | 0.493          | 0.903          | 0.182           | 0.728        | <b>7.55E-6</b> | 0.180          | 0.573           | 0.842        | 0.903          | 0.180        | 0.842          | 0.818           | 0.180          | 1.000          | 0.550          | 1.000 | 1.000 | 1.000 |
| Thaumarchaeota        | 1.000 | 0.136        | <b>0.022</b> | 1.000 | 0.963          | 0.839        | 0.457          | <b>0.005</b>   | 1.000          | 1.000           | 0.839        | 0.839          | 0.136          | 0.839           | 0.763        | 0.839          | 0.839        | 0.839          | 0.910           | <b>0.022</b>   | 0.839          | 1.000          | 1.000 | 1.000 | 1.000 |
